# Supplementary material
Source: publisher site journal article supplement (http://www.kjim.org/upload/media/kjim-2019-092-suppl2.pdf)
Supplement: Supplementary file 1 [file kjim-2019-092-suppl2.pdf]

**Supplementary Table 1. Geographic location and size of the 14 included military hospitals**

| Hospital | Geographic region                            | No. of beds |
|----------|----------------------------------------------|-------------|
| A        | Goyang City, Gyeonggi Province               | 250         |
| B        | Yangju City, Gyeonggi Province               | 500         |
| C        | Pocheon City, Gyeonggi Province              | 250         |
| D        | Chuncheon City, Gangwon Province             | 230         |
| E        | Hongcheon City, Gangwon Province             | 230         |
| F        | Guri City, Gyeonggi Province                 | 500         |
| G        | Gangneung City, Gangwon Province             | 180         |
| H        | Seoul Metropolitan City                      | 30          |
| I        | Wonju City, Gangwon Province                 | 20          |
| J        | Seongnam City, Gyeonggi Province             | 660         |
| K        | Gyeongsan City, North Gyeongsang Province    | 500         |
| L        | Daejeon Metropolitan City                    | 600         |
| M        | Busan Metropolitan City                      | 260         |
| N        | Hampyeong County, South Jeolla Province      | 500         |
| Total    | All 14 military hospitals affiliated to AFMC | 4,710       |

AFMC, Armed Forces Medical Command.
